# Supplementary material for: Innovators’ views on involving users and patients in surgical device development: a qualitative interview study
Source: HighWire-hosted journal article supplement (doi:10.1136/bmjopen-2021-050801), 2021-08-01
Supplement: bmjopen-2021-050801supp001_data_supplement.pdf [file bmjopen-2021-050801supp001_data_supplement.pdf]

## Supplemental material: Interview protocol

### Introduction

- Recording
- Introduction interviewer, research project
- Introduction specific research
- Informed consent and questions

| Phases product development |                   | Main question                                                                                                             | Prompts                                                   |
|----------------------------|-------------------|---------------------------------------------------------------------------------------------------------------------------|-----------------------------------------------------------|
|                            |                   | Which phases in product development do you distinguish?                                                                   |                                                           |
| <b>WHO</b>                 |                   |                                                                                                                           |                                                           |
| People outside company     | People per phase  | Not taking your employees into account: which people are involved in product development in the just mentioned phases?    | Why these people?<br>Who decided to include these people? |
| <b>HOW</b>                 |                   |                                                                                                                           |                                                           |
|                            |                   | How are these people involved in these phases?                                                                            |                                                           |
|                            | Methodical        | Method<br>Number participants<br>Setting<br>Repetition<br>Analysis<br>Findings                                            | Why this method?                                          |
|                            | Non-methodical    | Method<br>Number participants<br>Setting<br>Repetition<br>Analysis<br>Findings                                            | Why this method?                                          |
| <b>WHY</b>                 |                   |                                                                                                                           |                                                           |
|                            | Purpose           | For what reason were these people involved?                                                                               | Why are these reasons important?                          |
|                            | Practice          | How did involving these people lead to that purpose?<br>What was the added value of the consultations?                    |                                                           |
| <b>ADDITIONAL</b>          |                   |                                                                                                                           |                                                           |
|                            | First idea        | When did the first idea or concept of the device occur?                                                                   |                                                           |
|                            | Important changes | What was an important change in the design?<br>What led to that change?<br>Which people were involved in that alteration? |                                                           |
| <b>CLOSE</b>               |                   |                                                                                                                           |                                                           |
|                            |                   | Do you have additional questions?<br>Word of thanks.                                                                      |                                                           |
